# Supplementary material for: METastasis Reporting and Data System for Prostate Cancer: Practical Guidelines for Acquisition, Interpretation, and Reporting of Whole-body Magnetic Resonance Imaging-based Evaluations of Multiorgan Involvement in Advanced Prostate Cancer[image]
Source: PubMed Central journal article supplement — Eur Urol. 2017 Jan;71(1):81–92. doi: 10.1016/j.eururo.2016.05.033 (PMC5176005; doi:10.1016/j.eururo.2016.05.033), 2017-01
Supplement: mmc2.pdf [file mmc2.pdf]

**MET-RADS-PROSTATE:**  
**BASELINE: LOCAL AND VISCERAL DISEASE**

Pt identifier..... Scan Date ..... Reporter.....

| Region                        | Involved:<br>Y or N or N/A | Lesion<br>number | Description                                      |
|-------------------------------|----------------------------|------------------|--------------------------------------------------|
| Primary disease               |                            | --               | Involvement of adjacent structures recorded here |
| Lymph nodes (pelvis)          |                            |                  |                                                  |
| Lymph nodes (retroperitoneum) |                            |                  |                                                  |
| Lymph nodes (other)           |                            |                  |                                                  |
| Liver <sup>5</sup>            |                            |                  |                                                  |
| Lung <sup>4</sup>             |                            |                  |                                                  |
| Other sites                   |                            |                  |                                                  |

<sup>4</sup> Lung: 1; 2; 3-5; 6-10; >10. Document size of largest discrete lesion.  
<sup>5</sup> Liver: 1; 2; 3-5; 6-10; >10; diffuse infiltration. Document size of largest discrete lesion.

|                  |  |
|------------------|--|
| <b>Comments:</b> |  |
|------------------|--|

| Soft tissue metastases                                                           | Image reference | Baseline/Visit x (date) |
|----------------------------------------------------------------------------------|-----------------|-------------------------|
| <b>Target*</b>                                                                   |                 |                         |
| 1 <i>description including Location</i>                                          | sequence/image  | Size (mm/cm)            |
| 2 <i>description including Location</i>                                          | sequence/image  | Size (mm/cm)            |
| 3 <i>description including Location</i>                                          | sequence/image  | Size (mm/cm)            |
| 4 <i>description including Location</i>                                          | sequence/image  | Size (mm/cm)            |
| 5 <i>description including Location</i>                                          | sequence/image  | Size (mm/cm)            |
| <b>Non-Target lesions</b><br>(list)<br><i>description including Location</i>     |                 |                         |
| <b>Non-measurable lesions</b><br>(list)<br><i>description including Location</i> |                 |                         |
| <b>Local Disease</b><br><i>Description</i>                                       | sequence/image  | Size (mm/cm)            |

*\*Include up to 5 lymph nodes and visceral lesions. Not more 2 lesions per organ. No bone measurements (use prior form).*

**MET-RADS-PROSTATE:**  
**BASELINE: BONE DISEASE**

Pt identifier..... Scan Date ..... Reporter.....

| Region                             | Involved:<br>Y or N or N/A | Lesion<br>number | Size, location,<br>characteristics |
|------------------------------------|----------------------------|------------------|------------------------------------|
| Skull                              |                            |                  |                                    |
| Cervical spine                     |                            |                  |                                    |
| Thoracic spine                     |                            |                  |                                    |
| Lumbo-sacral spine                 |                            |                  |                                    |
| Ribs, shoulder girdle <sup>1</sup> |                            |                  |                                    |
| Pelvis                             |                            |                  |                                    |
| Extremities <sup>2</sup>           |                            |                  |                                    |

<sup>1</sup> Shoulder girdle includes scapula, clavicle; <sup>2</sup> Extremities includes proximal humeri and femora

<sup>3</sup> Bone lesions: 1; 2; 3-5; 6-10; >10; diffuse.

|                                                                                   |  |
|-----------------------------------------------------------------------------------|--|
| <b>Non-Target bone lesions</b><br>(list)<br><i>description incl. Location</i>     |  |
| <b>Non-measurable bone lesions</b><br>(list)<br><i>description incl. Location</i> |  |

|                                                   |                                                               |
|---------------------------------------------------|---------------------------------------------------------------|
| <b>Lesion 1</b><br><i>Location/sequence/image</i> | <b>Soft tissue</b><br>Y/N                                     |
|                                                   | <b>Size (mm)</b>                                              |
|                                                   | <b>ADC - mean</b><br>(in 10 <sup>-6</sup> mm <sup>2</sup> /s) |

|                                                   |                                                               |
|---------------------------------------------------|---------------------------------------------------------------|
| <b>Lesion 2</b><br><i>Location/sequence/image</i> | <b>Soft tissue</b><br>Y/N                                     |
|                                                   | <b>Size (mm)</b>                                              |
|                                                   | <b>ADC - mean</b><br>(in 10 <sup>-6</sup> mm <sup>2</sup> /s) |

|                                                   |                                                               |
|---------------------------------------------------|---------------------------------------------------------------|
| <b>Lesion 3</b><br><i>Location/sequence/image</i> | <b>Soft tissue</b><br>Y/N                                     |
|                                                   | <b>Size (mm)</b>                                              |
|                                                   | <b>ADC - mean</b><br>(in 10 <sup>-6</sup> mm <sup>2</sup> /s) |

|                                                   |                                                               |
|---------------------------------------------------|---------------------------------------------------------------|
| <b>Lesion 4</b><br><i>Location/sequence/image</i> | <b>Soft tissue</b><br>Y/N                                     |
|                                                   | <b>Size (mm)</b>                                              |
|                                                   | <b>ADC - mean</b><br>(in 10 <sup>-6</sup> mm <sup>2</sup> /s) |

|                                                   |                                                               |
|---------------------------------------------------|---------------------------------------------------------------|
| <b>Lesion 5</b><br><i>Location/sequence/image</i> | <b>Soft tissue</b><br>Y/N                                     |
|                                                   | <b>Size (mm)</b>                                              |
|                                                   | <b>ADC - mean</b><br>(in 10 <sup>-6</sup> mm <sup>2</sup> /s) |
