# Supplementary material for: METastasis Reporting and Data System for Prostate Cancer: Practical Guidelines for Acquisition, Interpretation, and Reporting of Whole-body Magnetic Resonance Imaging-based Evaluations of Multiorgan Involvement in Advanced Prostate Cancer[image]
Source: PubMed Central journal article supplement — Eur Urol. 2017 Jan;71(1):81–92. doi: 10.1016/j.eururo.2016.05.033 (PMC5176005; doi:10.1016/j.eururo.2016.05.033), 2017-01
Supplement: mmc3.pdf [file mmc3.pdf]

**MET-RADS-PROSTATE:**  
**FOLLOW-UP: LOCAL AND VISCERAL DISEASE**

Scan no..... Pt identifier..... Scan Date ..... Reporter.....

| Region                 | Involved<br>Yes/No/NA | Response Assessment Categories |                 |                |
|------------------------|-----------------------|--------------------------------|-----------------|----------------|
|                        |                       | Primary (1-5)                  | Secondary (1-5) | Tertiary (1-5) |
| Primary                |                       |                                |                 |                |
| Pelvic nodes           |                       |                                |                 |                |
| Para-aortic nodes      |                       |                                |                 |                |
| Other metastatic nodes |                       |                                |                 |                |
| Lungs                  |                       |                                |                 |                |
| Liver                  |                       |                                |                 |                |
| Other sites            |                       |                                |                 |                |

|                  |  |
|------------------|--|
| <b>Comments:</b> |  |
|------------------|--|

| <b>Soft tissue metastases<br/>FOLLOW-UP</b>                                                               | <b>Image<br/>reference</b>                                                | <i>Baseline/Visit x<br/>(date)</i> |
|-----------------------------------------------------------------------------------------------------------|---------------------------------------------------------------------------|------------------------------------|
| <b>Target*</b>                                                                                            |                                                                           |                                    |
| 1 <i>description including Location</i>                                                                   | sequence/image                                                            | Size (mm/cm)                       |
| 2 <i>description including Location</i>                                                                   | sequence/image                                                            | Size (mm/cm)                       |
| 3 <i>description including Location</i>                                                                   | sequence/image                                                            | Size (mm/cm)                       |
| 4                                                                                                         | sequence/image                                                            | Size (mm/cm)                       |
| 5                                                                                                         | sequence/image                                                            | Size (mm/cm)                       |
| <b>Non-Target lesions</b><br>(list)<br><i>description including Location</i>                              | Follow-up visits<br>Presence/absence<br>Increase/stable/decrease/resolved |                                    |
| <b>Non-measurable lesions</b><br>(list)<br><i>description including Location</i>                          | Follow-up visits<br>Presence/absence<br>Increase/stable/decrease/resolved |                                    |
| <b>New lesions</b><br>(list)<br><i>description including Location</i><br><i>Non-baseline studies only</i> | sequence/image                                                            |                                    |
| <b>Local Disease</b><br><i>Description</i>                                                                | sequence/image                                                            | Size (mm/cm)                       |

*\*Include up to 5 lymph nodes and visceral lesions. Not more 2 lesions per organ. No bone measurements (use prior form).*

**MET-RADS-PROSTATE:**  
**FOLLOW-UP: BONE DISEASE**

Pt identifier..... Scan Date ..... Reporter.....

| Region                       | Involved<br>Yes/No/NA | Response Assessment Categories |                 |                |
|------------------------------|-----------------------|--------------------------------|-----------------|----------------|
|                              |                       | Primary (1-5)                  | Secondary (1-5) | Tertiary (1-5) |
| Primary                      |                       |                                |                 |                |
| Pelvic nodes                 |                       |                                |                 |                |
| Para-aortic<br>nodes         |                       |                                |                 |                |
| Other<br>metastatic<br>nodes |                       |                                |                 |                |
| Lungs                        |                       |                                |                 |                |
| Liver                        |                       |                                |                 |                |
| Other sites                  |                       |                                |                 |                |

|  |                                                               |                                                        |
|--|---------------------------------------------------------------|--------------------------------------------------------|
|  | <b><i>Bone Lesion 1</i></b><br><i>Location/sequence/image</i> | Soft tissue<br>Y/N                                     |
|  |                                                               | Size<br><b>(mm)</b>                                    |
|  |                                                               | ADC - mean<br>(in 10 <sup>-6</sup> mm <sup>2</sup> /s) |
|  | <b>Signal intensity extent</b>                                | Increased, Decreased, Stable                           |

|  |                                                               |                                                        |
|--|---------------------------------------------------------------|--------------------------------------------------------|
|  | <b><i>Bone Lesion 2</i></b><br><i>Location/sequence/image</i> | Soft tissue<br>Y/N                                     |
|  |                                                               | Size<br><b>(mm)</b>                                    |
|  |                                                               | ADC - mean<br>(in 10 <sup>-6</sup> mm <sup>2</sup> /s) |
|  | <b>Signal intensity extent</b>                                | Increased, Decreased, Stable                           |
|  | <b><i>Bone Lesion 3</i></b><br><i>Location/sequence/image</i> | Soft tissue<br>Y/N                                     |
|  |                                                               | Size<br><b>(mm)</b>                                    |
|  |                                                               | ADC - mean<br>(in 10 <sup>-6</sup> mm <sup>2</sup> /s) |
|  | <b>Signal intensity extent</b>                                | Increased, Decreased, Stable                           |
|  | <b><i>Bone Lesion 4</i></b><br><i>Location/sequence/image</i> | Soft tissue<br>Y/N                                     |
|  |                                                               | Size<br><b>(mm)</b>                                    |
|  |                                                               | ADC - mean<br>(in 10 <sup>-6</sup> mm <sup>2</sup> /s) |
|  | <b>Signal intensity extent</b>                                | Increased, Decreased, Stable                           |
|  | <b><i>Bone Lesion 5</i></b><br><i>Location/sequence/image</i> | Soft tissue<br>Y/N                                     |
|  |                                                               | Size<br><b>(mm)</b>                                    |
|  |                                                               | ADC - mean<br>(in 10 <sup>-6</sup> mm <sup>2</sup> /s) |
|  | <b>Signal intensity extent</b>                                | Increased, Decreased, Stable                           |
